# Supplementary material for: Pregnancy and delivery after spine fracture or surgery: A nationwide population-based register study in Finland
Source: PubMed Central journal article supplement (PMC9355215; doi:10.1371/journal.pone.0272579), 2022-08-05
Supplement: pone.0272579.s001.pdf [file pone.0272579.s001.pdf]

Supplementary Table 1: Definitions for ICD-10-codes and NOMESCO classification codes for fracture-related and other major spine operations included in this study.

| ICD-10 Code                                                                         | Definition                                                                         |
|-------------------------------------------------------------------------------------|------------------------------------------------------------------------------------|
| S120                                                                                | Fracture of first cervical vertebra                                                |
| S121                                                                                | Fracture of second cervical vertebra                                               |
| S122                                                                                | Fracture of third cervical vertebra                                                |
| S127                                                                                | Multiple fractures of cervical vertebra                                            |
| S128                                                                                | Fracture of other parts of neck                                                    |
| S129                                                                                | Fracture of neck, unspecified                                                      |
| S220                                                                                | Fracture of thoracic vertebra                                                      |
| S221                                                                                | Multiple fractures of thoracic vertebra                                            |
| S320                                                                                | Fracture of lumbar vertebra                                                        |
| S321                                                                                | Fracture of sacrum                                                                 |
| <b>NOMESCO classification of major surgical procedure related to spine fracture</b> |                                                                                    |
| Procedure code                                                                      | Definition                                                                         |
| NAJ 10                                                                              | Anterior reduction of fracture of cervical spine                                   |
| NAJ 12                                                                              | Posterior reduction of fracture of cervical spine                                  |
| NAJ 20                                                                              | Anterior reduction of fracture of thoracic spine                                   |
| NAJ 22                                                                              | Posterior reduction of fracture of thoracic spine                                  |
| NAJ 30                                                                              | Anterior reduction of fracture of lumbar spine                                     |
| NAJ 32                                                                              | Posterior reduction of fracture of lumbar spine                                    |
| <b>NOMESCO classification of fusion surgery</b>                                     |                                                                                    |
| Procedure code                                                                      | Definition                                                                         |
| NAG 40                                                                              | Anterior fusion of cervical spine without fixation                                 |
| NAG 41                                                                              | Anterior fusion of cervical spine with fixation                                    |
| NAG 42                                                                              | Posterior fusion of cervical spine with or without fixation                        |
| NAG 50                                                                              | Anterior fusion of thoracic spine without fixation                                 |
| NAG 51                                                                              | Anterior fusion of thoracic spine with fixation                                    |
| NAG 52                                                                              | Posterior or lateral fusion of thoracic spine with fixation, 2-3 vertebrae         |
| NAG 53                                                                              | Posterior or lateral fusion of thoracic spine with fixation, more than 3 vertebrae |
| NAG 57                                                                              | Anterior and posterior fusion of thoracic spine                                    |
| NAG 60                                                                              | Anterior fusion of lumbar spine with fixation                                      |
| NAG 61                                                                              | Posterior fusion of lumbar spine without fixation                                  |
| NAG 62                                                                              | Posterior fusion of lumbar spine with fixation, 2-3 vertebrae                      |
| NAG 63                                                                              | Posterior fusion of lumbar spine with fixation, more than 3 vertebrae              |
| NAG 65                                                                              | Anterior and posterior fusion of lumbar spine                                      |
| NAG 66                                                                              | Posterior interbody fusion of lumbar spine, 2 vertebrae                            |
| NAG 67                                                                              | Posterior interbody fusion of lumbar spine, more than 2 vertebrae                  |
