# Supplementary material for: Pregnancy and delivery after spine fracture or surgery: A nationwide population-based register study in Finland
Source: PubMed Central journal article supplement (PMC9355215; doi:10.1371/journal.pone.0272579), 2022-08-05
Supplement: pone.0272579.s002.pdf [file pone.0272579.s002.pdf]

Supplementary table 2: Frequencies of the spine operations and the mean age of the women at the time of operation in these subgroups during the study period.

| Code   | Definition                                                                         | n    | %    | Mean age (SD) |
|--------|------------------------------------------------------------------------------------|------|------|---------------|
| NAJ 10 | Anterior reduction of fracture of cervical spine                                   | 132  | 1.3  | 29.8 (10.7)   |
| NAJ 12 | Posterior reduction of fracture of cervical spine                                  | 34   | 0.3  | 35.6 (10.8)   |
| NAJ 20 | Anterior reduction of fracture of thoracic spine                                   | 7    | 0.1  | 27.1 (12.6)   |
| NAJ 22 | Posterior reduction of fracture of thoracic spine                                  | 236  | 2.4  | 32.2 (10.7)   |
| NAJ 30 | Anterior reduction of fracture of lumbar spine                                     | 28   | 0.3  | 31.1 (11.1)   |
| NAJ 32 | Posterior reduction of fracture of lumbar spine                                    | 505  | 5.1  | 30.6 (10.4)   |
| NAG 40 | Anterior fusion of cervical spine without fixation                                 | 3593 | 36.2 | 42.6 (5.3)    |
| NAG 41 | Anterior fusion of cervical spine with fixation                                    | 621  | 6.3  | 41.5 (6.6)    |
| NAG 42 | Posterior fusion of cervical spine with or without fixation                        | 130  | 1.3  | 39.3 (8.6)    |
| NAG 50 | Anterior fusion of thoracic spine without fixation                                 | 14   | 0.1  | 27.0 (10.5)   |
| NAG 51 | Anterior fusion of thoracic spine with fixation                                    | 20   | 0.2  | 27.1 (12.3)   |
| NAG 52 | Posterior or lateral fusion of thoracic spine with fixation, 2-3 vertebrae         | 32   | 0.3  | 40.3 (9.1)    |
| NAG 53 | Posterior or lateral fusion of thoracic spine with fixation, more than 3 vertebrae | 757  | 7.6  | 19.1 (7.2)    |
| NAG 57 | Anterior and posterior fusion of thoracic spine                                    | 17   | 0.2  | 30.8 (14.5)   |
| NAG 60 | Anterior fusion of lumbar spine with fixation                                      | 183  | 1.8  | 33.9 (11.5)   |
| NAG 61 | Posterior fusion of lumbar spine without fixation                                  | 188  | 1.9  | 36.3 (11.3)   |
| NAG 62 | Posterior fusion of lumbar spine with fixation, 2-3 vertebrae                      | 2011 | 20.3 | 40.3 (7.7)    |
| NAG 63 | Posterior fusion of lumbar spine with fixation, more than 3 vertebrae              | 384  | 3.9  | 36.4 (11.3)   |
| NAG 65 | Anterior and posterior fusion of lumbar spine                                      | 469  | 4.7  | 38.9 (9.0)    |
| NAG 66 | Posterior interbody fusion of lumbar spine, 2 vertebrae                            | 516  | 5.2  | 40.4 (7.6)    |
| NAG 67 | Posterior interbody fusion of lumbar spine, more than 2 vertebrae                  | 52   | 0.5  | 42.4 (6.2)    |
